# Supplementary material
Source: Springer Nature journal article supplement (https://openaccess.sgul.ac.uk/id/eprint/118514/2/12889_2026_26668_MOESM1_ESM.docx)
Supplement: MOESM1 [file 12889_2026_26668_MOESM1_ESM.docx]

**Additional file 1** Topic guide

*Opening questions*

1. You have already completed half a year of study, what do you think of the entire ENERGISED program?
2. What aspects did you like the most?
3. Are there any aspects you didn't like?
4. What motivated you to participate in the study?
5. Do you think following the ENERGISED program has changed your activity level?
6. In general, have there been any obstacles in implementing the ENERGISED program?

## *Fitbit watch*

1. I would like to ask you about the Fitbit watch - what do you think about this technology?
   1. Did you have any experience with Fitbit before starting the ENERGISED program?
   2. How do you think using Fitbit has affected your physical activity?

## *Messages received on the phone*

I would now like to ask you about the messages you received as part of the intervention.

1. What do you think about receiving the messages within the program?
2. Can you describe to what extent their acceptance has affected your level of activity?
   1. If it did not affect, can you say why? What are the reasons?
   2. What would you like differently so that the news would influence you more and motivate you to move?
   3. If it led to higher activity, can you say why? What are the reasons?
3. Was there ever a situation where you could not respond to a message as you would have liked?
   1. Why was that? What were your reasons for doing so?
   2. And could it be prevented somehow? Or solve it somehow?
4. Can you tell me what types of messages you received? Do you notice any difference between them? (This is an introductory question to the following sections, in which we attempt to discuss each type of text message systematically. However, we do not assume that all participants will be able to truly distinguish between each type and will flexibly adapt to their abilities.)

**Just-in-time messages to increase walking pace (triggered when a patient walks for 5 consecutive minutes)**

1. What do you think about the messages that aimed to increase the frequency, i.e. the speed of your walking?
2. What do you think about their content and form?
3. What do you think about the frequency of these messages?
4. What do you think of the timing of these reports?
   1. Did you receive these messages at appropriate times?
   2. IF NOT - even so, do you think it was important to speed up walking on your next occasion?
   3. IF YES - and do you think it was important for subsequent?

**Just-in-time messages to interrupt the sitting (triggered when a patient has been sitting for more than 30 minutes)**

1. What do you think about the messages that were intended to interrupt your extended sitting?
2. What do you think about their content and form?
3. What do you think about the frequency of these messages?
4. What do you think of the timing of these reports?
   1. Did you receive these messages at appropriate times?
   2. IF NOT - even so, do you think it was important to interrupt the siting on your next occasion?
   3. IF YES - and do you think it was important for the subsequent or immediate interruption of the siting?

**Ongoing review of the weekly step goal (Friday evening) and feedback on the patient's weekly performance and encouragement for the upcoming week (Sunday evening)**

1. How did you feel when you received feedback on the ongoing fulfilment or fulfilment/failure of your weekly goal?
2. Did it motivate or, conversely, demotivate you to do more physical activity at the weekend/in the coming week?
3. Is there any other feedback you would like to receive?

**Occasional educational messages**

1. What do you think about these educational messages you have been receiving?
2. Did knowing this information help you to increase your physical activity?

## *Phone consultant support*

1. You had telephone consultations as part of the intervention. Can you please tell me what you think about these telephone consultations?
2. Have you changed your behaviour in any way based on these telephone consultations?
3. Did goal setting and correction with consultants help you?
4. Have you also had conversations about how to find the best opportunity to increase physical activity?
5. What do you think about setting up opportunities to increase movement that have been tailored to you as much as possible?
6. Did the telephone consultations help you as a guide for complying with the prompts from the messages?
7. Do you feel that telephone consultations had an effect on you overall in terms of increasing your physical activity?
8. Do you think you would have achieved the same change in physical activity even without telephone consultations?

## *Additional final questions*

1. In general, have you had any technical problems with the ENERGISED program?
   1. IF YES - To what extent did these technical problems affect your behaviour in the ENERGISED program? (Regarding your motivation and emotions to fulfil challenges, etc.)
2. You have completed about 6 months of the program and have another 6 months to go (the whole program lasts 1 year). Would you like to continue the reports long-term, even after the program ends?
3. On a scale of 1 (not at all) to 10 (definitely yes), how much would you recommend this program to someone in your family or friends?
4. Why did you choose this particular number?
5. Do you have a tip on how the ENERGISED program could be improved?
